# Supplementary material
Source: MDPI journal article supplement (https://www.mdpi.com/2071-1050/9/8/1459)
Supplement: s1 [file s1]

# Supplementary Data

**Table S1. Summary of the characteristics of agricultural payments for ecosystem services case in China and study area (Mengyin County).**

| Table S1.1 Main characteristics of agricultural payments for ecosystem services case in China      |                                |                                        |                                                                                                            |                              |
|----------------------------------------------------------------------------------------------------|--------------------------------|----------------------------------------|------------------------------------------------------------------------------------------------------------|------------------------------|
| Program/Policy                                                                                     | Start year                     | Who initiated?                         | Targeted ecosystem services                                                                                | Reference                    |
| Rural biogas development                                                                           | 2001-2005 <sup>a</sup>         | Central government                     | Fermentation for organic waste, water protection                                                           | [1]                          |
| Promoting conservation tillage                                                                     | 2002 <sup>b</sup>              | Central government                     | Soil protection, reducing soil erosion                                                                     | [2,3]                        |
| Agricultural support protection subsidies (The“three subsidies”policy)                             | 2004 <sup>c</sup>              | Central government                     | Food, soil protection                                                                                      | [4]                          |
| Soil testing and fertilizer recommendation                                                         | 2005 <sup>d</sup>              | Central government                     | Soil protection, decreasing external inputs                                                                | [5]                          |
| Organic fertilizer subsidy                                                                         | 2004 <sup>e</sup>              | Municipal government (Shanghai)        | Soil protection, improving soil fertility                                                                  | [6,7]                        |
| Safe pesticides subsidy                                                                            | 2009 <sup>f</sup>              | Municipal government (Beijing)         | Soil and water protection, using low or non-toxic pesticides                                               | [8,9]                        |
| Fish cultivation in rice fields                                                                    | 2007-2009 <sup>g</sup>         | Dali prefecture government (Dali City) | Biological weed and pest control                                                                           | [10]                         |
| Incentive mechanism for paddy field conservation                                                   | 2013-2015 <sup>h</sup>         | Municipal government (Suzhou)          | Soil and water quality protection, preventing paddy fields from turning into non-agriculturalization areas | [11]                         |
| Table S1.2 Main characteristics of agricultural payments for ecosystem services case in study area |                                |                                        |                                                                                                            |                              |
| Program/Policy                                                                                     | Start year<br>(Mengyin County) | Mode of payment                        | Payment amount, cash equivalent<br>(Mengyin County)                                                        | Restricted<br>conditionality |
| Rural biogas development                                                                           | 2003 <sup>i</sup>              | Cash                                   | 800-1000 Yuan/ biogas pool (8-10 m <sup>3</sup> )                                                          | Overburdened local           |

|                                                                        |                        |                                         |                                                                                |                                                                                              |
|------------------------------------------------------------------------|------------------------|-----------------------------------------|--------------------------------------------------------------------------------|----------------------------------------------------------------------------------------------|
| Agricultural support protection subsidies (The“three subsidies”policy) | 2004 <sup>i</sup>      | Cash + in-kind                          | 1875 Yuan/ ha/yr (2016)                                                        | farmers and high administration costs<br>Monitoring costs; risk of reducing other incentives |
| Soil testing and fertilizer recommendation                             | 2005-2007 <sup>i</sup> | Technical assistance + free information | Total cash equivalent 350,000 Yuan/yr (2015); in fact lower or highly variable | Funding and information availability, knowledge of land use-soil testing information links   |

<sup>a</sup> China’s 10th Five-Year Plan (2001-2005) calls for promoting rural renewable energy technologies and rural biogas development. Rural biogas development has been creatively developed with the southern “pig-biogas-fruit” (a combination of pig husbandry with biogas and fruit tree planting) and the northern “pig-biogas-vegetable-greenhouse” (a combination of pig husbandry with biogas, vegetable planting and sunlight greenhouse building) as typical models.

<sup>b</sup> In 2002, the Chinese government was actively involved in the demonstration and extension of conservation tillage practices. Since 2002, the Chinese Ministry of Agriculture has formulated a plan to promote a widespread application of conservation tillage throughout the dryland regions of northern China.

<sup>c</sup> Beginning in 2004, agriculture taxes were eliminated and subsidies in the form of cash, high-quality grain seeds, and machinery (The“three subsidies”policy) have been made to households to stimulate grain production and increase farmer income. Most of cash and grain seed subsidies are non-distorting and account for the majority of agricultural subsidies in the 2000s, but machinery subsidy is based on farmers’ actual purchase of machineries and are still far less than other two. In 2016, three subsidies have merged into agricultural support protection subsidies.

<sup>d</sup> In 2005, the No. 1 document from the national central government clearly regarded "soil testing and fertilizer recommendation" as one of the largest domestic technologies across the country. The technology of soil testing and fertilizer recommendation can not only decrease costs and increase the benefits of agriculture but also reduce agricultural non-point source pollution and greenhouse gas emissions.

<sup>e</sup> In 2004, the municipality of Shanghai which has established incentives or pilot programs aimed at enhancing organic waste utilization and reducing pollution. The subsidy contributed to the straw recycling and the use of green manure and organic fertilizers.

<sup>f</sup> In 2009, the municipality of Beijing proposed a series of subsidy policies to lead farmers to apply proper pesticide and scientific farming. Based on a non-contact IC card and a precision management system, agricultural-related subsidies are managed.

<sup>g</sup> Based on the Erhai catchment project in Yunnan, with the compensation object being farmers in the watershed, the Dali Prefecture government tested methods of funding compensation, technical compensation and intellectual compensation from 2007 to 2009.

<sup>h</sup> From 2013 to 2015, the municipal government of Suzhou defined the general land use planning and identified protected fields by the land and agricultural administrative sectors.

<sup>i</sup> Document database (2003-2016) from agricultural administrative sectors and finance bureau of Mengyin County.

## Statistical analysis

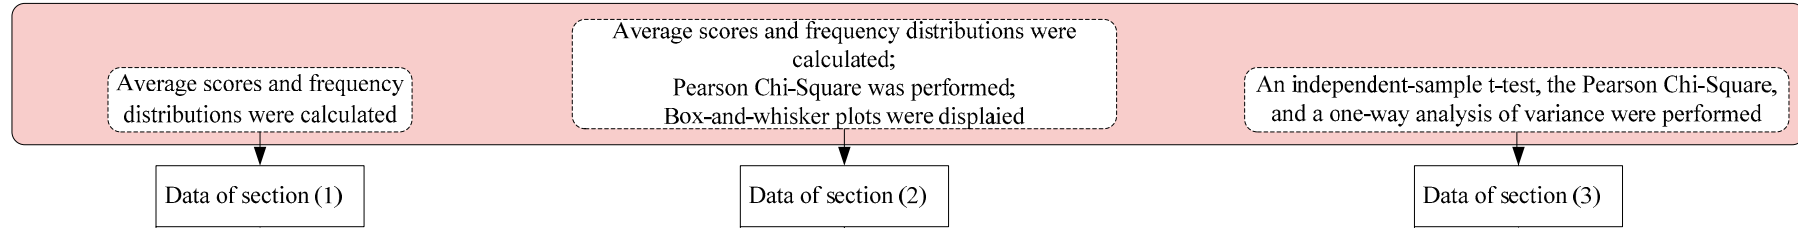

## A theoretical and analytical framework

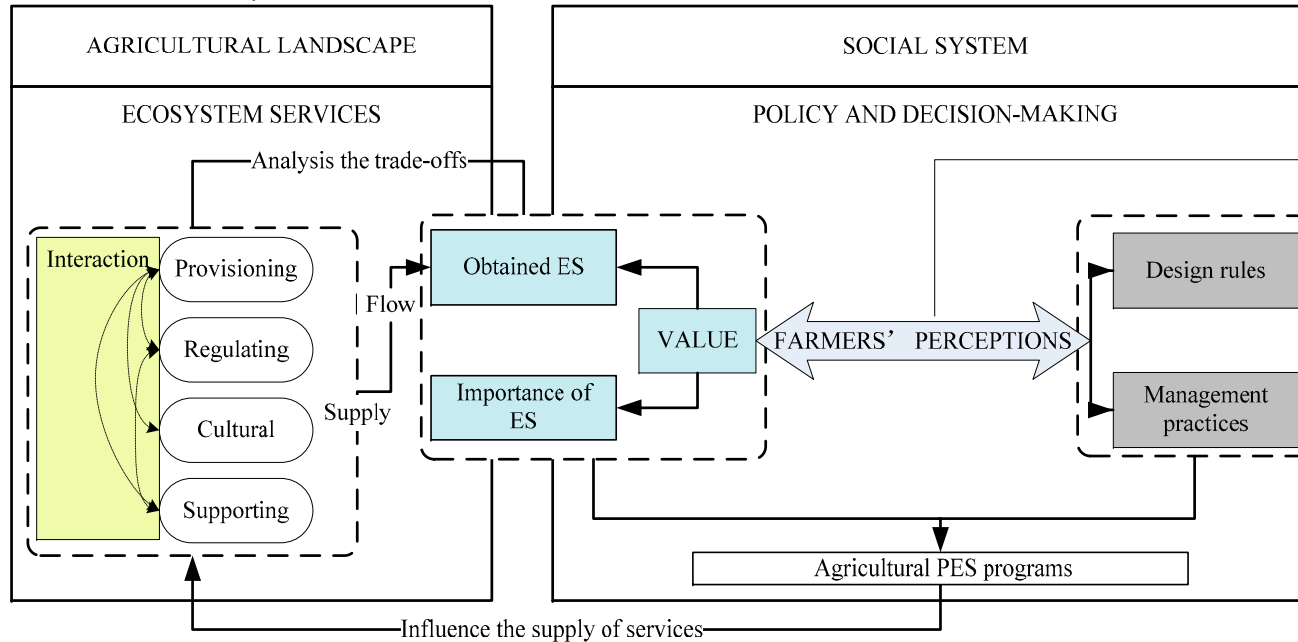

**ES: ecosystem services**

**PES: payments for ecosystem services**

A total of 44 villages were selected, and in every village we conducted face-to-face interviews that contained three sections:

- (1) characteristics of the farmland and the farmer
- (2) farmers' perceptions of ES
- (3) farmers' perceptions of PES schemes

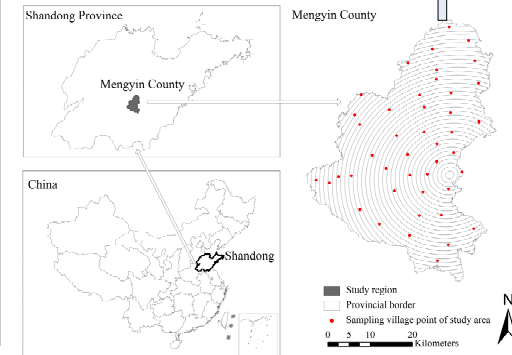

Survey regions in China

**Figure S1.** Graphic abstract. A list of 17 ecosystem services was used in this study, including 4 provisioning services (Food, Raw materials, Medicinal resources, Ornamental resources); 7 regulating services (Water purification, Water regulation, Maintaining healthy waterways and reservoirs, Waste assimilation, Natural hazard regulation, Pollination, Biological pest control); 3 cultural services (Recreation and aesthetic values, Cultural heritage values, Discriminating features and sense of place); 3 supporting services (Maintenance of soil fertility and health, Maintenance of natural genetic diversity, Maintenance of semi-natural habitat). A list of 14 management measures was used in this study, including 7 off-field practices (Hedgerow management, Grassland management, Riparian strips vegetation management, Field margins vegetation management, Ecologically sound for the management of forest land, Flower and protection strips on riparian , Flower and protection strips on field margins) and 7 on-field practices (Crop rotation, Intercropping , Protection for wild plants on fields, Application of mulch and direct sowing, Maintenance of orchard mulching, Flower strips on crop land, Organic farming).

**Table S2. Summary of published studies on the ecosystem structure, processes, function and services of the 14 selected management measures.**

| Management measures | Ecosystem services                                   | Ecosystem structure, processes and function                            | Reference                                                                                                                                                                                                                                                                                                                                                                   |
|---------------------|------------------------------------------------------|------------------------------------------------------------------------|-----------------------------------------------------------------------------------------------------------------------------------------------------------------------------------------------------------------------------------------------------------------------------------------------------------------------------------------------------------------------------|
| Off-field practices | Hedgerow management                                  | Maintenance of semi-natural habitat<br>Recreation and aesthetic values | Hedgerows are a key semi-natural habitat for biodiversity, act as a corridor of movement and dispersal for many species, and respond to the aesthetic wishes of the local population. [12,13]                                                                                                                                                                               |
|                     | Grassland management                                 | Maintenance of soil fertility and health<br>Water regulation           | Grassland management could enhance the plant-soil cycle with the function of the soil structure and water regulations under grassland conditions. [14,15]                                                                                                                                                                                                                   |
|                     | Riparian strips vegetation management                | Natural hazard regulation<br>Water purification                        | Riparian vegetative buffer strips can be used to intercept surface runoff flow, nutrient and other organic pollutants before they enter the stream and can improve the water quality and reduce the flood risk. [16,17]                                                                                                                                                     |
|                     | Field margins vegetation management                  | Maintenance of semi-natural habitat<br>Biological pest control         | Field margins are linear semi-natural structures, are important for many flora and fauna, and provide habitat functions for natural enemies of crop herbivores. [18,19]                                                                                                                                                                                                     |
|                     | Ecologically sound for the management of forest land | Maintenance of the semi-natural habitat<br>Water regulation            | Ecologically sound stewardship has long been a cornerstone of the forestry profession. By connecting the lower atmosphere with deep ground water, they regulate regional climate, speed up soil development, with roots injecting organic matter into the ground, and produce habitat structures that provide food and shelter for myriad organisms, including humans. [20] |
|                     | Flower and protection strips on riparian             | Maintenance of natural genetic diversity<br>Pollination                | Sowing flower and protection strips on riparian can enhance habitat heterogeneity and ecological connectivity to promote insect pollinators and drive pollinator diversity in intensively managed landscapes. [21]                                                                                                                                                          |
|                     | Flower and protection strips on field margins        | Recreation and aesthetic values<br>Pollination                         | Sowing flower and protection strips on field margins, such as adding early-season nectar-producing plants, can improve pollination and the aesthetic value of the landscape. [22,23]                                                                                                                                                                                        |

**Table S2. Continued.**

| Management measures | Ecosystem services                     | Ecosystem structure, processes and function                         | Reference                                                                                                                                                                                                                                                                                                    |
|---------------------|----------------------------------------|---------------------------------------------------------------------|--------------------------------------------------------------------------------------------------------------------------------------------------------------------------------------------------------------------------------------------------------------------------------------------------------------|
| On-field practices  | Crop rotation                          | Maintenance of soil fertility and health<br>Biological pest control | Increasing crop diversity through rotation aims to restore positive above ground–below ground interactions and use biotic interactions to reduce chemical inputs. High diversity rotations can sustain soil biological communities, with positive effects on soil organic matter and soil fertility. [24,25] |
|                     | Intercropping                          | Maintenance of soil fertility and health<br>Biological pest control | Intercropping increases plant diversity in cropping systems and has the potential to increase soil physical stability and control weeds, pests and diseases compared to sole cropping. [26,27]                                                                                                               |
|                     | Protection for wild plants on fields   | Maintenance of natural genetic diversity<br>Biological pest control | Wild plants are a promising source of traits that could enable plants to withstand insect attack and other stressful conditions, and they harbor a reservoir of genetic traits. Setting aside some farmland as wildlife habitat may not reduce crop yields with less input of harmful chemicals. [28,29]     |
|                     | Application of mulch and direct sowing | Biological pest control<br>Water regulation                         | Direct seeding mulch-based cropping has the potential to increase soil water tension, thus reducing water stress risks for the crop, and it favors natural enemies, thus disfavoring pests. [30]                                                                                                             |
|                     | Maintenance of orchard mulching        | Maintenance of soil fertility and health<br>Water regulation        | Orchard mulching application significantly alters the soil bacterial community structure and function, benefits the development of soil quality, and improves the soil water-holding capacity. [31]                                                                                                          |
|                     | Flower strips on crop land             | Biological pest control<br>Pollination                              | Sowing flower strips on crop land can provide forage for a range of pollinating species, offering undisturbed habitats for natural enemy populations. [32]                                                                                                                                                   |
|                     | Organic farming                        | Maintenance of soil fertility and health<br>Biological pest control | Increasing both the total extent of organic farming and the connectivity of individual farms can restore parasitoid diversity and enhance soil health. [33,34]                                                                                                                                               |

Note: Each management measure only summarizes two individual services that were listed in this study and were reported by published studies on that ecosystem structure, processes and function giving rise to the biophysical supply of ecosystem services.

## References

1. Zhen, L.; Zhang, H. Payment for ecosystem services in china: An overview. *Living Reviews in Landscape Research* **2011**, *5*, 5-21.
2. Wang, X.; Cai, D.; Hoogmoed, W.; Oenema, O.; Perdok, U. Developments in conservation tillage in rainfed regions of north china. *Soil Till Res.* **2007**, *93*, 239-250.
3. Zhang, F.; Zhao, M.; Zhang, B. Problem in the development of conservation tillage in north of china. *Rev. China Agric. Sci. Technol.* **2004**, *6*, , 36–39. (in Chinese)
4. Tian, Q.; Holland, J.H.; Brown, D.G. Social and economic impacts of subsidy policies on rural development in the poyang lake region, china: Insights from an agent-based model. *Agr. Syst.* **2016**, *148*, 12-27.
5. Li, Q.X.; Huang, C.C.; Pan, G.X. The study on the method of soil testing and fertilizer recommendation based on the perspective of management of resources and environment. *Chinese Agr. Sci. B.* **2014**, *8*, 028. (in Chinese)
6. Li, Y.; Zhang, W.; Ma, L.; Huang, G.; Oenema, O.; Zhang, F.; Dou, Z. An analysis of china's fertilizer policies: Impacts on the industry, food security, and the environment. *J. Environ. Qual.* **2013**, *42*, 972-981.
7. Zhao, X.; Wu, F.W. Discussions on establishing agro-ecological compensation in shanghai. *Shanghai Rural Economy* **2008**, *7*, 25-27. (in Chinese)
8. Chi, Z.; Tian'en, C.; Liping, C. In *A precision subsidy management system for strawberry planting in changping district of beijing*, International Conference on Computer and Computing Technologies in Agriculture, 2010; Springer: pp 103-109.
9. Zou, X.Z. An analysis of beijing agro-ecological service value and eco-compensation mechanism. *Journal of Beijing Social Science* **2010**, *3*, 53-59. (in Chinese)
10. Zhao, R.; Gao, S.B.; Yang, P.; Ni, X.Y. Study on agricultural eco-compensation mechanism in erhai catchment, yunnan province. *Agro-Environment & Development* **2011**, *4*, 009.
11. Long, K.; Wang, Y.; Zhao, Y.; Chen, L. Who are the stakeholders and how do they respond to a local government payments for ecosystem services program in a developed area: A case study from suzhou, china. *Habitat Int.* **2015**, *49*, 1-9.
12. Staley, J.T.; Botham, M.S.; Chapman, R.E.; Amy, S.R.; Heard, M.S.; Hulmes, L.; Savage, J.; Pywell, R.F. Little and late: How reduced hedgerow cutting can benefit lepidoptera. *Agr. Ecosyst. Environ.* **2016**, *224*, 22-28.
13. Staley, J.T.; Sparks, T.H.; Croxton, P.J.; Baldock, K.C.; Heard, M.S.; Hulmes, S.; Hulmes, L.; Peyton, J.; Amy, S.R.; Pywell, R.F. Long-term effects of hedgerow management policies on resource provision for wildlife. *Biol. Conserv.* **2012**, *145*, 24-29.
14. Sanderson, M.A.; Wätzold, F. Balancing trade-offs in ecosystem functions and services in grassland management. *Grassland Sci. Eur.* **2010**, *15*, 639-648.
15. Van Eekeren, N.; Murray, P.; Smeding, F. Soil biota in grassland, its ecosystem services and the impact of management. *Grassland Sci. Eur.* **2007**, *12*, 247-257.
16. McVittie, A.; Norton, L.; Martin-Ortega, J.; Siameti, I.; Glenk, K.; Aalders, I. Operationalizing an ecosystem services-based approach using bayesian belief networks: An application to riparian buffer strips. *Ecol. Econ.* **2015**, *110*, 15-27.
17. Lin, C.; Chou, W.; Lin, W. Modeling the width and placement of riparian vegetated buffer strips: A case study on the chi-jia-wang stream, taiwan. *J. Environ. Manage.* **2002**, *66*, 269-280.
18. Bischoff, A.; Pollier, A.; Lamarre, E.; Salvadori, O.; Cortesero, A.-M.; Le Ralec, A.; Tricault, Y.; Jaloux, B. Effects of spontaneous field margin vegetation and surrounding landscape on brassica oleracea crop herbivory. *Agr. Ecosyst. Environ.* **2016**, *223*, 135-143.
19. Olson, D.M.; Wäckers, F.L. Management of field margins to maximize multiple ecological services. *J. Appl. Ecol.* **2007**, *44*, 13-21.
20. Nadrowski, K.; Wirth, C.; Scherer-Lorenzen, M. Is forest diversity driving ecosystem function and service? *Curr. Opin. Env. Sust.* **2010**, *2*, 75-79.
21. Cole, L.J.; Brocklehurst, S.; Robertson, D.; Harrison, W.; McCracken, D.I. Riparian buffer strips: Their role in the conservation of insect pollinators in intensive grassland systems. *Agr. Ecosyst. Environ.* **2015**, *211*, 207-220.
22. Balzan, M.V.; Bocci, G.; Moonen, A.C. Utilisation of plant functional diversity in wildflower strips for the delivery of multiple agroecosystem services. *Entomol. Exp. Appl.* **2016**, *158*,



- 304-319.
23. Marshall, E.; Moonen, A. Field margins in northern europe: Their functions and interactions with agriculture. *Agr. Ecosyst. Environ.* **2002**, *89*, 5-21.
  24. Tiemann, L.; Grandy, A.; Atkinson, E.; Marin - Spiotta, E.; McDaniel, M. Crop rotational diversity enhances belowground communities and functions in an agroecosystem. *Ecol. Lett.* **2015**, *18*, 761-771.
  25. Gaba, S.; Lescourret, F.; Boudsocq, S.; Enjalbert, J.; Hinsinger, P.; Journet, E.-P.; Navas, M.-L.; Wery, J.; Louarn, G.; Malézieux, E. Multiple cropping systems as drivers for providing multiple ecosystem services: From concepts to design. *Agron. Sustain. Dev.* **2015**, *35*, 607-623.
  26. Molinuevo-Salces, B.; Larsen, S.U.; Ahring, B.K.; Uellendahl, H. Biogas production from catch crops: Increased yield by combined harvest of catch crops and straw and preservation by ensiling. *Biomass Bioenerg.* **2015**, *79*, 3-11.
  27. Brooker, R.W.; Bennett, A.E.; Cong, W.F.; Daniell, T.J.; George, T.S.; Hallett, P.D.; Hawes, C.; Iannetta, P.P.; Jones, H.G.; Karley, A.J. Improving intercropping: A synthesis of research in agronomy, plant physiology and ecology. *New Phytol.* **2015**, *206*, 107-117.
  28. Pieterse, C.M.; de Jonge, R.; Berendsen, R.L. The soil-borne supremacy. *Trends Plant Sci.* **2016**, *21*, 171-173.
  29. Tamiru, A.; Khan, Z.R.; Bruce, T.J. New directions for improving crop resistance to insects by breeding for egg induced defence. *Curr. Opin. Insect Sci.* **2015**, *9*, 51-55.
  30. Kulagowski, R.; Riggi, L.; Chailleux, A. Short-term effects of conversion to direct seeding mulch-based cropping systems on macro-fauna and weed dynamics. *Journal of Crop Improvement* **2016**, *30*, 65-83.
  31. Qian, X.; Gu, J.; Pan, H.-j.; Zhang, K.-y.; Sun, W.; Wang, X.-j.; Gao, H. Effects of living mulches on the soil nutrient contents, enzyme activities, and bacterial community diversities of apple orchard soils. *Eur. J. Soil Biol.* **2015**, *70*, 23-30.
  32. Tschumi, M.; Albrecht, M.; Bärtschi, C.; Collatz, J.; Entling, M.H.; Jacot, K. Perennial, species-rich wildflower strips enhance pest control and crop yield. *Agr. Ecosyst. Environ.* **2016**, *220*, 97-103.
  33. Inclán, D.J.; Cerretti, P.; Gabriel, D.; Benton, T.G.; Sait, S.M.; Kunin, W.E.; Gillespie, M.A.; Marini, L. Organic farming enhances parasitoid diversity at the local and landscape scales. *J. Appl. Ecol.* **2015**, *52*, 1102-1109.
  34. Abbott, L.K.; Manning, D.A. Soil health and related ecosystem services in organic agriculture. *Sustainable Agr. Res.* **2015**, *4*, 116.
